# Supplementary material
Source: publisher figshare collection journal article supplement (https://geolsoc.figshare.com/ndownloader/files/34318102)
Supplement: Supplementary file 1 [file 34318102]

## Sheet: Foglio1
	Table S3
	Sample_ID	LA-ICP-MS lines	87Sr/86Sr	2SD	Cal
	PA_5.8_HR_C	Line20	0.707456	6.3899e-05	HR_cement
	PA_7.27a_HR_C	Line04	0.707521	5.35358e-05	HR_cement
	PA_7.27a_HR_C	Line05	0.707485	6.46298e-05	HR_cement
	PA_7.27a_HR_C	Line06	0.707508	5.23931e-05	HR_cement
	PA_6.12_HR_C	Line15	0.707505	5.22425e-05	HR_cement
	PA_3.24_HR_B_sol	/	0.70756	4.21149e-06	Host_Rock_bulk_Calcaires gréseux à miches
	PA_3.40_HR_B_sol	/	0.707494	5.33347e-06	Host_Rock_bulk_Calcaires gréseux à miches
	PA_3.41_HR_B_sol	/	0.707509	6.36044e-06	Host_Rock_bulk_Calcaires gréseux à miches
	PA_3.8_HR_B_sol	/	0.707591	8.36403e-06	Host_Rock_bulk_Urgonian Limestones
	PA_7.13_HR_B_sol	/	0.707557	6.53671e-06	Host_Rock_bulk_Urgonian Limestones
	PA_8.11_HR_B_sol	/	0.707537	6.56008e-06	Host_Rock_bulk_Urgonian Limestones
	PA_8.16_HR_B_sol	/	0.707566	5.79034e-06	Host_Rock_bulk_Urgonian Limestones
	PA3.41_HR_1	/	0.707645	3.53869e-06	Host_Rock_bulk_leaching
	PA3.41_HR_2	/	0.707573	4.87233e-06	Host_Rock_bulk_leaching
	PA3.41_HR_3	/	0.707478	4.4648e-06	Host_Rock_bulk_leaching
	PA3.8_HR_1	/	0.707578	6.07321e-06	Host_Rock_bulk_leaching
	PA3.8_HR_2	/	0.707556	7.05922e-06	Host_Rock_bulk_leaching
	PA3.8_HR_3	/	0.707532	4.87233e-06	Host_Rock_bulk_leaching
	PA_5.19_V1_a	Line9	0.707661	0.00011723	Cal-1a
	PA_5.19_V1_a	Line11	0.707797	8.8629e-05	Cal-1a
	PA_5.19_V1_b	Line12	0.707729	9.11948e-05	Cal-1a
	PA_5.19_V1_b	Line13	0.707702	8.53808e-05	Cal-1a
	PA_5.19_V1_b	Line14	0.707808	7.51674e-05	Cal-1a
	PA_5.19_V1_sol	/	0.70772	7.12632e-06	Cal-1a
	PA_5.20_V1_sol	/	0.707766	7.41695e-06	Cal-1a
	PA_7.27a_V1_sol	/	0.707804	5.74643e-06	Cal-1b
	PA_3.41_V2_sol	/	0.707728	5.9479e-06	Cal-1b
	PA_7.30b_V4_sol	/	0.707819	7.06367e-06	Cal-1b
	PA_3.21_CT	Line17	0.707569	5.12716e-05	Cal-1 "type"
	PA_3.21_CT	Line18	0.707664	6.15572e-05	Cal-1 "type"
	PA_3.21_CT	Line19	0.707684	6.46608e-05	Cal-1 "type"
	PA_3.21_CT_1	Line26	0.707711	3.49633e-05	Cal-1 "type"
	PA_3.21_CT_1	Line27	0.70782	4.76688e-05	Cal-1 "type"
	PA_3.21_CT_1	Line28	0.707599	5.63786e-05	Cal-1 "type"
	PA_3.21_CT_1	Line29	0.707785	6.21272e-05	Cal-1 "type"
	PA_3.21_CT_1	Line30	0.707661	3.83099e-05	Cal-1 "type"
	PA_3.21_CT_1	Line31	0.707778	6.2917e-05	Cal-1 "type"
	PA_3.21_CT_sol	/	0.707615	6.31384e-06	Cal-1 "type"
	PA_9.10c_VT_sol	/	0.70764	4.24667e-06	Cal-1 "type"
	PA_5.19_V5	Line15	0.707846	3.8396e-05	Cal-2
	PA_5.19_V5	Line16	0.707868	5.41232e-05	Cal-2
	PA_5.19_V5_sol	/	0.707846	6.37963e-06	Cal-2
	PA_5.6_FR	Line24	0.707854	4.66656e-05	Cal-2
	PA_5.6_FR	Line25	0.707893	6.67103e-05	Cal-2
	PA_5.6_FR_sol	/	0.707837	8.18533e-06	Cal-2
	PA_6.7_V4	Line31	0.707977	7.18193e-05	Cal-2
	PA_6.7_V4	Line32	0.707919	8.6361e-05	Cal-2
	PA_6.9_V4_sol	/	0.707674	1.10265e-05	Cal-2
	PA_5.8_V5	Line19	0.707773	4.23429e-05	Cal-3
	PA_5.8_V5	Line21	0.708095	8.84405e-05	Cal-3
	PA_5.8_V5	Line22	0.707869	7.09444e-05	Cal-3
	PA_5.8_sol	/	0.70788	7.83147e-06	Cal-3
	PA_3.1_V5_a	Line34	0.707623	0.000252555	Cal-3
	PA_3.1_V5_a_sol	/	0.7078	1.11343e-05	Cal-3
	PA_3.1_V5_b_sol	/	0.707696	1.40672e-05	Cal-3
	PA_3.25_FR	Line18	0.707681	7.77419e-05	Cal-4
	PA_3.25_FR	Line20	0.707754	0.000122061	Cal-4
	PA_3.25_FR	Line22	0.70791	0.000119944	Cal-4
	PA_3.25_FR	Line19	0.709435	0.000192444	Cal-4
	PA_3.25_FR	Line21	0.709276	0.000230359	Cal-4
	PA_6.12_V6	Line10	0.707699	3.4286e-05	Cal-5
	PA_6.12_V6	Line11	0.707781	5.85243e-05	Cal-5
	PA_6.12_V6	Line12	0.708025	0.00021093	Cal-5
	PA_6.12_V6	Line13	0.707525	0.000321666	Cal-5
	PA_6.12_V6	Line14	0.707637	6.16447e-05	Cal-5
